# Supplementary material
Source: PubMed Central journal article supplement (PMC3644140)

**Fig. S1. Enhanced expression of endoglin during oxygen-induced Ischemic retinopathy (OIR).** Retinal frozen sections prepared from P12 and P15 Eng<sup>+/+</sup> mice kept in normal air or exposed to OIR (5 days of high oxygen (P12); or 5 days of high oxygen and 5 days of normal air (P17)) were stained with anti-endoglin (×100). Please note strong endoglin staining of retinal vasculature in P17 retinas during OIR, when maximum retinal neovascularization occurs. These experiments were repeated three times with eyes from three different mice.

**Fig. S2. Postnatal retinal vascular development in Endoglin<sup>+/-</sup> mice.** Wholemout retinas were prepared from Eng<sup>+/+</sup> (A,C) or Eng<sup>+/-</sup> (B,D) mice and stained with anti-collagen IV to visualize retinal vasculature. A,B: 5-day-old mice (×25). C,D: 21-day-old mice (×25).

**Fig. S3. Enhanced proliferation of retinal vascular cells in Eng<sup>+/-</sup> mice.** 10-day-old Eng<sup>+/+</sup> (A) and Eng<sup>+/-</sup> (B) mice were injected with 5-bromo-2-deoxyuridine (BrdU; 0.12 g/kg body mass) and sacrificed 1.5 h later. Wholemout retinas were stained with collagen IV (red) and BrdU (green; ×400). (C) Bars indicate mean number of BrdU positive nuclei per whole retina (\*\**P*<0.01; n=5). These experiments were repeated with eyes from at least 5 different mice with similar results.

**Fig. S4. Expression of integrins in retinal EC.** α1-, α2-, α3-, α5-, αV-, β1-, β3-, β8-, α5β1-, and αVβ3-integrin expression on retinal EC was determined by FACS. These experiments were repeated with two different isolations of EC with similar results.

**Fig. S5. Expression of EC markers, ZO-1, and TGFβ receptors in the retinas.** (A) The expression levels of PECAM-1, VE-cadherin, ICAM-2, ZO-1, TGFβRII, and ALK5 in retinal lysates prepared from 4-week-old Eng<sup>+/+</sup> and Eng<sup>+/-</sup> mice were determined by western blot analysis. (B) The relative protein levels were quantified as described in the Methods (\**P*<0.05, n=3; \*\**P*<0.01, n=3; \*\*\**P*<0.001, n=3). (C) VEGF levels in the retinas was determined using an ELISA system (\*\**P*<0.01, n=3).

Supplemental Fig. 1

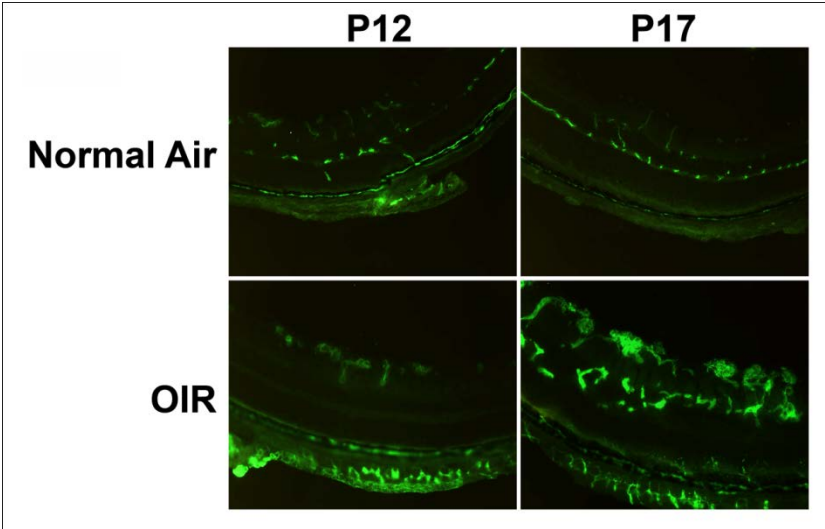

Supplemental Fig. 2

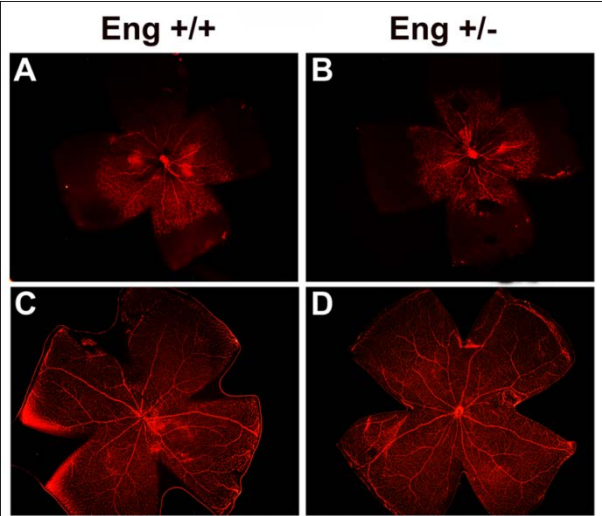

Supplemental Fig. 3

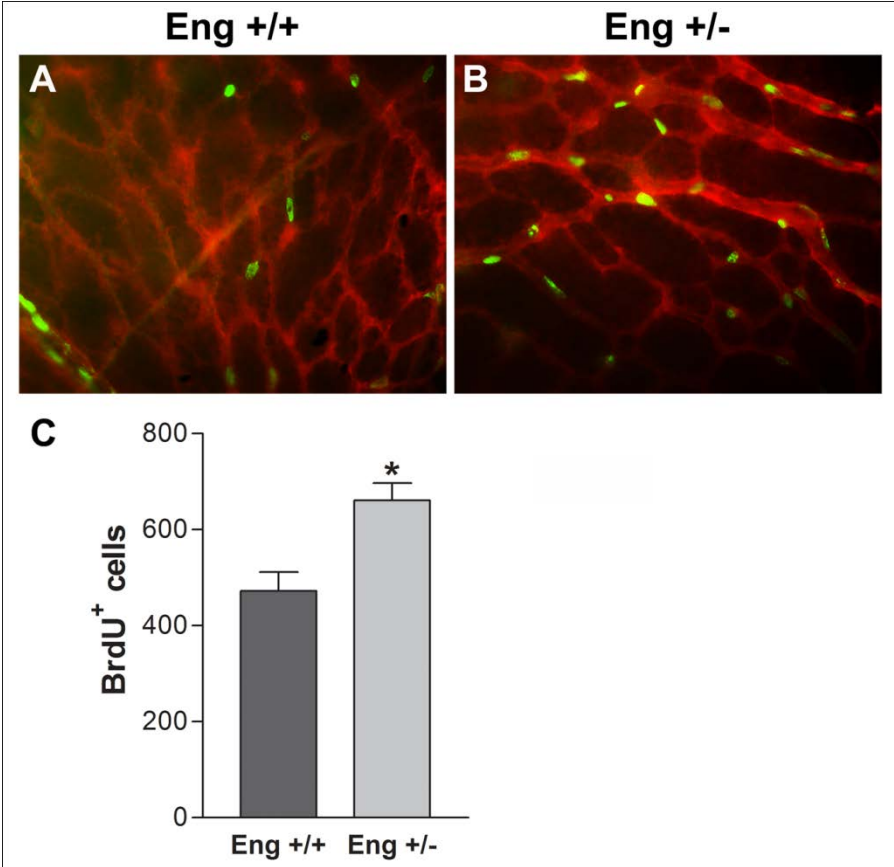

Supplemental Fig. 4

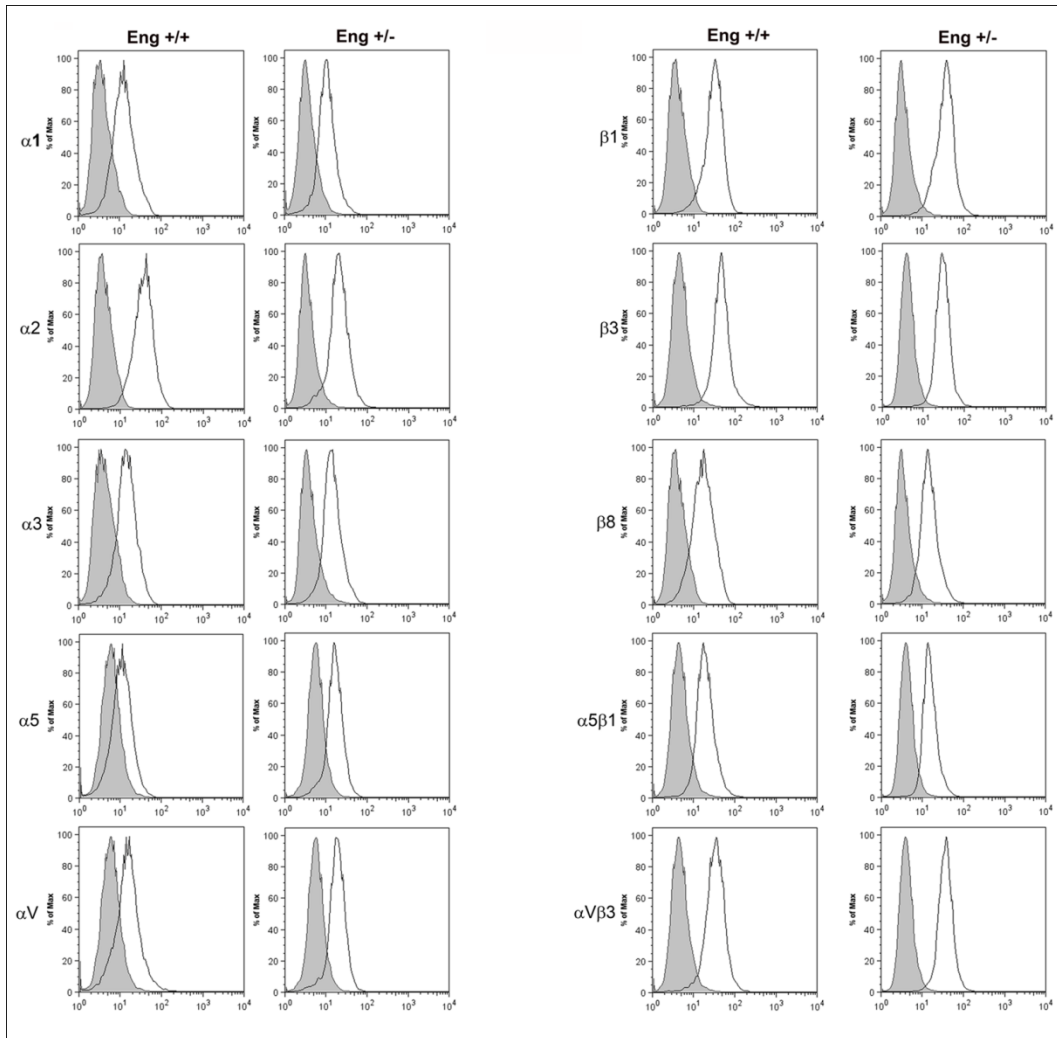

Supplemental Fig. 5

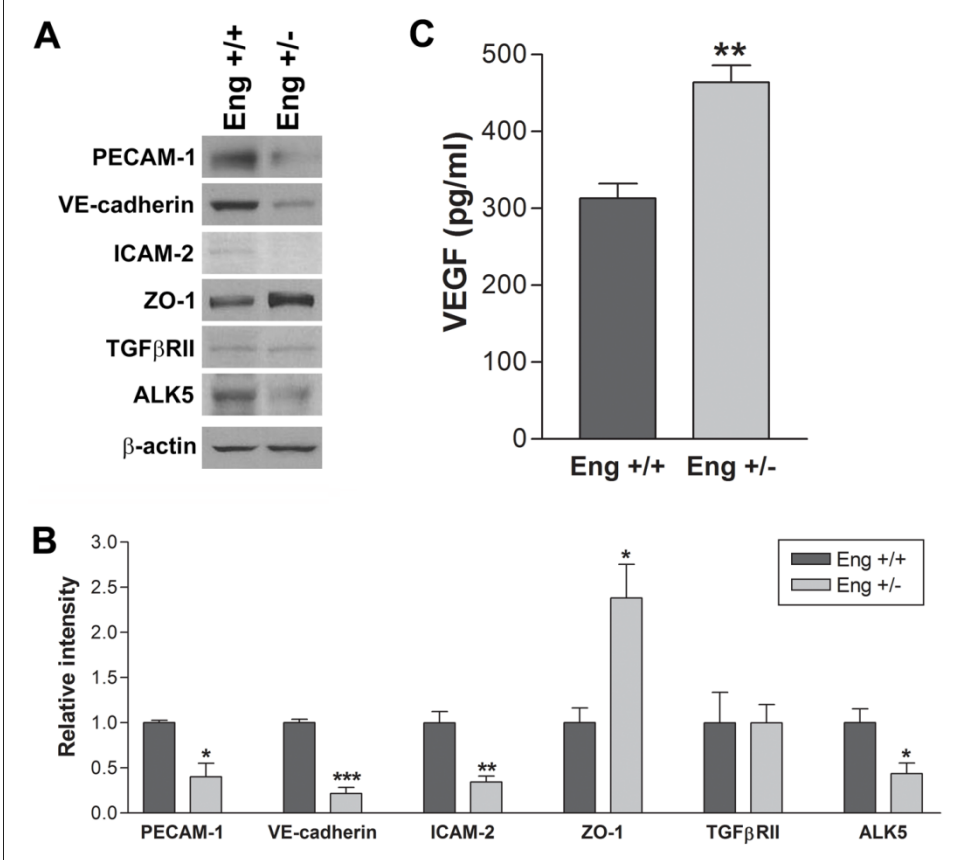

Supplement: supp_126.6.1392_JCS117275.pdf [file supp_126.6.1392_JCS117275.pdf]
